# Supplementary material for: Endogenous Circadian Regulation of Pro-inflammatory Cytokines and Chemokines in the Presence of Bacterial Lipopolysaccharide in Humans
Source: PubMed Central journal article supplement — Brain Behav Immun. Author manuscript; Available in PMC 2016 Jul 1. (PMC4430446; doi:10.1016/j.bbi.2014.11.003), 2014-11-13
Supplement: NIHMS661768-supplement-Supplemental_Material.pdf [file NIHMS661768-supplement-Supplemental_Material.pdf]

## SUPPLEMENTAL MATERIAL

### **Endogenous Circadian Regulation of Pro-inflammatory Cytokines and Chemokines in the Presence of Bacterial Lipopolysaccharide in Humans**

Shadab A. Rahman<sup>a,b</sup>, Oscar Castanon-Cervantes<sup>c</sup>, Frank A.J.L. Scheer<sup>a,b</sup>, Steven A. Shea<sup>a,b,d</sup>, Charles A. Czeisler<sup>a,b</sup>, Alec J. Davidson<sup>c</sup> and Steven W. Lockley<sup>a,b</sup>

<sup>a</sup> Division of Sleep and Circadian Disorders, Departments of Medicine and Neurology, Brigham and Women's Hospital, 221 Longwood Ave., Boston, MA, 02115;

<sup>b</sup> Division of Sleep Medicine, Department of Medicine, Harvard Medical School, 164 Longwood Ave., Boston, MA, 02115;

<sup>c</sup> Neuroscience Institute, Morehouse School of Medicine, 720 Westview Dr. S.W., Atlanta, GA, 30310;

<sup>d</sup> Oregon Institute of Occupational Health Sciences, Oregon Health & Science University, 3181 S.W. Sam Jackson Park Rd., Portland, OR, 97239.

**Corresponding Author:** Shadab A. Rahman, Ph.D., Division of Sleep and Circadian Disorders, Departments of Medicine and Neurology, Brigham and Women's Hospital, Division of Sleep Medicine, Department of Medicine, Harvard Medical School, 221 Longwood Ave., Boston, MA 02115, United States. Tel.: +1 617 525 8830.  
E-mail address: sarahman@rics.bwh.harvard.edu

**Supplemental Table 1: Percentage of total population with significant cosinor regression using four different models.**

| <b>Exploratory Model Selection</b> |                          |      |       |               |
|------------------------------------|--------------------------|------|-------|---------------|
| Constant Routine                   |                          |      |       |               |
| Model                              | GM-CSF                   | IL-8 | MCP-1 | TNF- $\alpha$ |
| 1                                  | 62.5                     | 46.2 | 38.5  | 30.8          |
| 2                                  | 0.0                      | 15.4 | 30.8  | 7.7           |
| 3                                  | 25.0                     | 30.8 | 30.8  | 30.8          |
| 4                                  | 12.5                     | 7.7  | 0.0   | 30.8          |
| Baseline                           |                          |      |       |               |
| Model                              | GM-CSF                   | IL-8 | MCP-1 | TNF- $\alpha$ |
| 1                                  | 33.3                     | 18.2 | 18.2  | 0.0           |
| 2                                  | 16.7                     | 0.0  | 27.3  | 0.0           |
| 3                                  | 16.7                     | 63.6 | 27.3  | 72.7          |
| 4                                  | 33.3                     | 18.2 | 27.3  | 27.3          |
| Model 1                            | Single Harmonic          |      |       |               |
| Model 2                            | Single Harmonic + Linear |      |       |               |
| Model 3                            | Dual Harmonic            |      |       |               |
| Model 4                            | Dual Harmonic + Linear   |      |       |               |
| <b>Final Model Selection</b>       |                          |      |       |               |
| Constant Routine                   |                          |      |       |               |
| Model                              | GM-CSF                   | IL-8 | MCP-1 | TNF- $\alpha$ |
| 1                                  | 62.5                     | 69.2 | 61.5  | 38.5          |
| 2                                  | 37.5                     | 30.8 | 38.5  | 61.5          |
| Baseline                           |                          |      |       |               |
| Model                              | GM-CSF                   | IL-8 | MCP-1 | TNF-a         |
| 1                                  | 50.0                     | 45.5 | 36.4  | 36.4          |
| 2                                  | 50.0                     | 54.6 | 63.6  | 63.6          |
| Model 1                            | Single Harmonic          |      |       |               |
| Model 2                            | Dual Harmonic            |      |       |               |

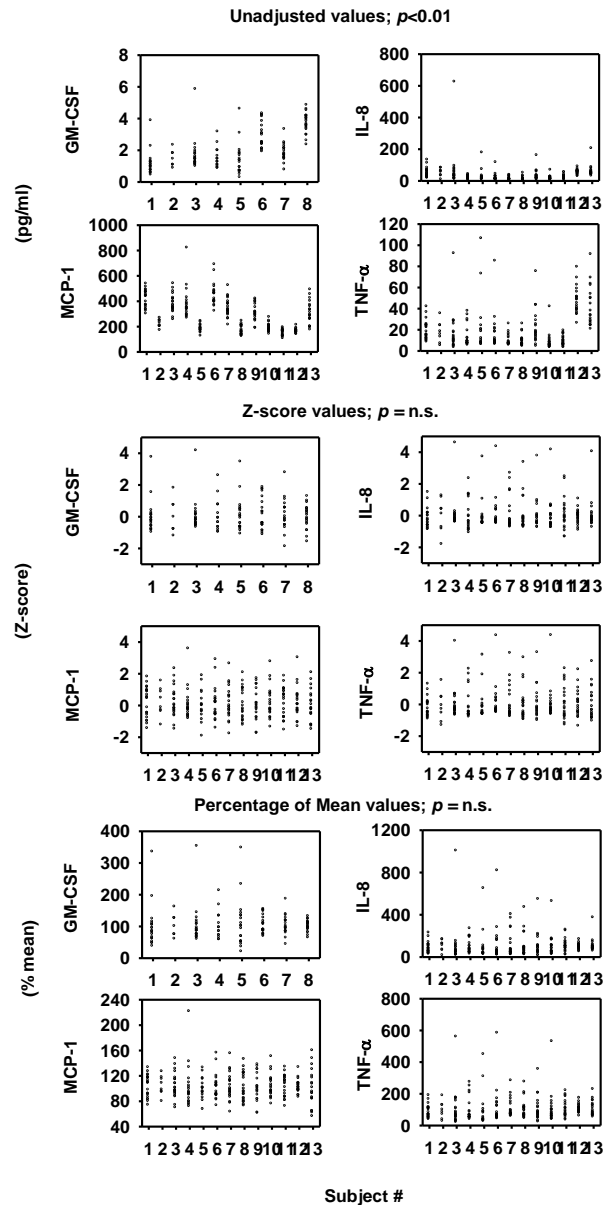

**Supplemental Figure 1**

**Supplemental Figure 1. Baseline differences in cytokine and chemokine expression between individuals.** Individual data are shown from each participant as unadjusted or after Z-score and percentage-of-mean transformations. One-way mixed model analysis showed significant differences between participants in unadjusted cytokine and chemokine levels, independent of LPS dose. These differences were not significant ( $p=n.s.$ ) when analyzed using Z-score and percentage-of-mean transformed data.

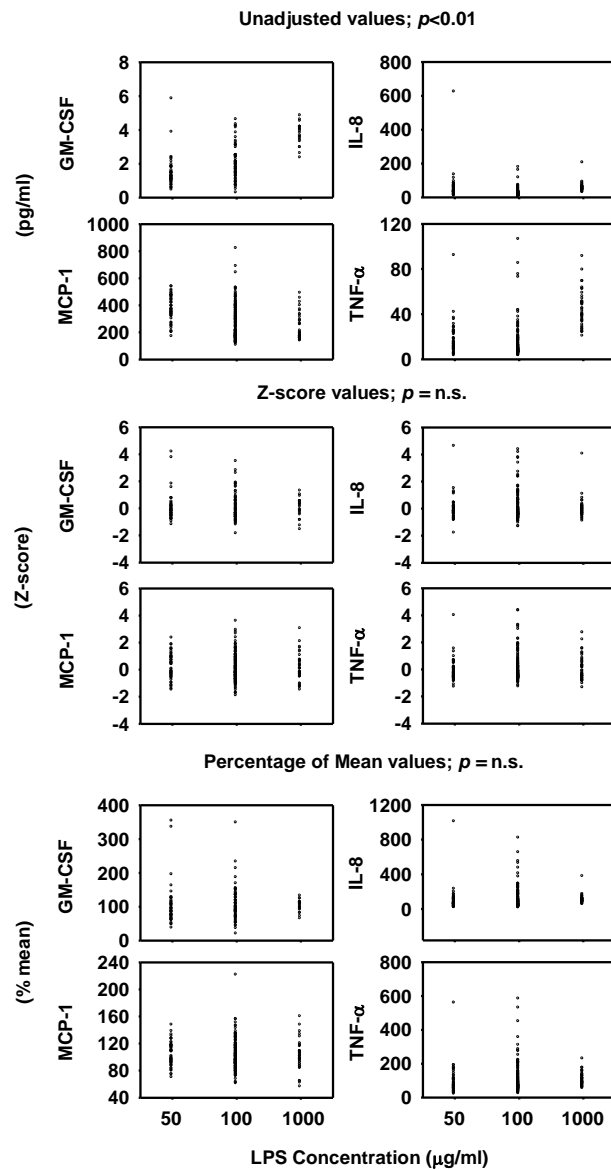

**Supplemental Figure 2**

**Supplemental Figure 2. Cytokine and chemokine expression dose response to LPS stimulation.** Individual data are shown from each participant as unadjusted or after Z-score and percentage-of-mean transformations. One-way mixed model analysis showed significant differences between doses in unadjusted cytokine and chemokine levels. These differences were not significant ( $p = \text{n.s.}$ ) when analyzed using Z-score and percentage-of-mean transformed data.

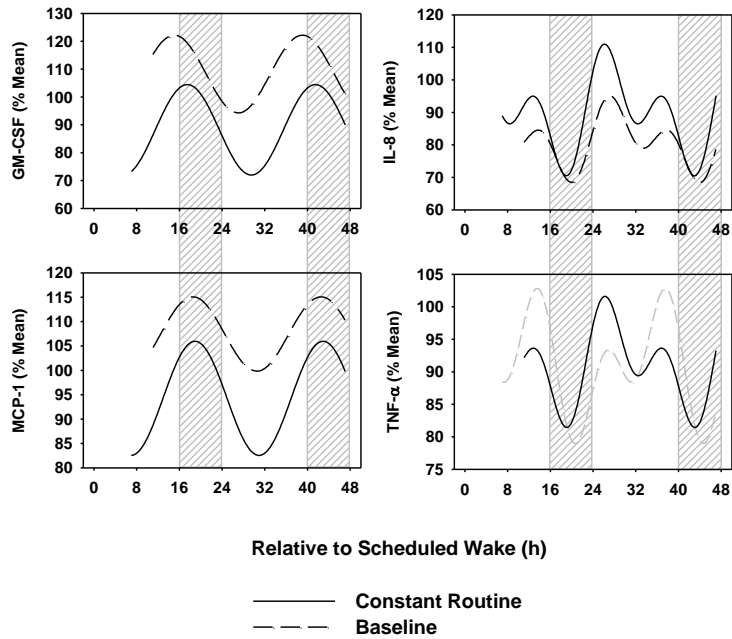

Supplemental Figure 3

**Supplemental Figure 3. Daily baseline and circadian rhythms in innate immune response in the subset of samples treated with the same dose.** Group data mean  $\pm$  SEM (left panel) and group-mean fitted cosinor functions under baseline conditions with standard sleep-wake schedules (dashed lines) and constant conditions (solid lines) of MCP-1, GM-CSF, IL-8 and TNF- $\alpha$ . Non-significant regression fits are marked in gray lines. Hashed gray bars represent group mean scheduled sleep times. Throughout the constant routine participants remained awake.
